# Supplementary material for: Degree of Fibrosis in Human Atrial Tissue Is Not the Hallmark Driving AF
Source: MDPI journal article supplement (doi:10.3390/cells11030427), 2022-01-26
Supplement: s1 [file s1]

# Supplemental Material

**Table S1.** Clinical characteristics of patients included in quantification of total amount of fibrosis (picrosirius red).

|                                          |                    |
|------------------------------------------|--------------------|
| Number of patients                       | 62                 |
| Male                                     | 41 (66.1)          |
| Age (years)                              | 66.6774±12.07867   |
| BMI                                      | 26.78 (19.11-38.2) |
| Type of AF                               |                    |
| - Paroxysmal                             | 13 (21)            |
| - Persistent                             | 18 (29)            |
| - Longstanding persistent                | 13 (21)            |
| Hypertension                             | 42 (67.7)          |
| Dyslipidemia                             | 22 (35.5)          |
| Diabetes Mellitus                        | 13 (21)            |
| Thyroid disease                          | 7 (11.3)           |
| Underlying Cardiac Diseases              |                    |
| - Congenital heart disease (CHD)         | 6 (9.7)            |
| - Aortic valve disease (AVD)             | 9 (14.5)           |
| - Coronary artery bypass grafting (CABG) | 16 (25.8)          |
| - Mitral valve disease (MVD)             | 14 (22.6)          |
| - MAZE                                   | 4 (6.5)            |
| - AVD + CABG                             | 9 (14.5)           |
| - MVD + CABG                             | 4 (6.5)            |

Values are presented as N (%), mean ± SD or median (min-max). BMI = body mass index, LA = left atrium, RA = right atrium.

**Table S2.** Clinical characteristics of patients included in quantification of cardiomyocyte hypertrophy.

|                                          |                     |
|------------------------------------------|---------------------|
| Number of patients                       | 41                  |
| Male                                     | 25 (61)             |
| Age (years)                              | 65.3171±11.04183    |
| BMI                                      | 26.81 (20.42-38.20) |
| Type of AF                               |                     |
| - Paroxysmal                             | 9 (22)              |
| - Persistent                             | 12 (29.3)           |
| - Longstanding persistent                | 8 (19.5)            |
| Hypertension                             | 27 (65.9)           |
| Dyslipidemia                             | 15 (36.6)           |
| Diabetes Mellitus                        | 8 (19.5)            |
| Thyroid disease                          | 4 (9.8)             |
| Underlying Cardiac Diseases              |                     |
| - Congenital heart disease (CHD)         | 4 (9.8)             |
| - Aortic valve disease (AVD)             | 6 (14.6)            |
| - Coronary artery bypass grafting (CABG) | 8 (19.5)            |
| - Mitral valve disease (MVD)             | 10 (24.4)           |
| - MAZE                                   | 4 (9.8)             |
| - AVD + CABG                             | 6 (14.6)            |
| - MVD + CABG                             | 3 (7.3)             |

Values are presented as N (%), mean ± SD or median (min-max). BMI = body mass index, LA = left atrium, RA = right atrium.

**Table S3.** Clinical characteristics of patients included in quantification of endomysial and perimysial fibrosis.

|                                          |                     |
|------------------------------------------|---------------------|
| Number of patients                       | 29                  |
| Male                                     | 18 (62.1)           |
| Age (years)                              | 63.8966 ±11.65      |
| BMI                                      | 25.95 (22.15-36.33) |
| Type of AF                               |                     |
| - Paroxysmal                             | 8 (27.6)            |
| - Persistent                             | 8 (27.6)            |
| - Longstanding persistent                | 5 (17.2)            |
| Hypertension                             | 18 (62.1)           |
| Dyslipidemia                             | 11 (37.9)           |
| Diabetes Mellitus                        | 3 (10.3)            |
| Thyroid disease                          | 3 (10.3)            |
| Underlying Cardiac Diseases              |                     |
| - Congenital heart disease (CHD)         | 4 (13.8)            |
| - Aortic valve disease (AVD)             | 4 (13.8)            |
| - Coronary artery bypass grafting (CABG) | 3 (10.3)            |
| - Mitral valve disease (MVD)             | 6 (20.7)            |
| - MAZE                                   | 4 (13.8)            |
| - AVD + CABG                             | 5 (17.2)            |
| - MVD + CABG                             | 3 (10.3)            |

Values are presented as N (%), mean ± SD or median (min-max). BMI = body mass index, LA = left atrium, RA = right atrium.

**Table S4.** Clinical characteristics of patients included in quantification of  $\alpha$ SMA and TIMP expressions.

|                                          |                      |
|------------------------------------------|----------------------|
| Number of patients                       | 90                   |
| Male                                     | 65 (72.2)            |
| Age (years)                              | 67.922 $\pm$ 11.319  |
| BMI                                      | 27.1100 (19.11-38.2) |
| Type of AF                               |                      |
| - Paroxysmal                             | 13 (14.4)            |
| - Persistent                             | 20 (22.2)            |
| - Longstanding persistent                | 13 (14.4)            |
| Hypertension                             | 62 (68.9)            |
| Dyslipidemia                             | 31 (34.4)            |
| Diabetes Mellitus                        | 22 (24.4)            |
| Thyroid disease                          | 9 (10)               |
| Underlying Cardiac Diseases              |                      |
| - Congenital heart disease (CHD)         | 6 (6.7)              |
| - Aortic valve disease (AVD)             | 12 (13.3)            |
| - Coronary artery bypass grafting (CABG) | 35 (38.9)            |
| - Mitral valve disease (MVD)             | 15 (16.7)            |
| - MAZE                                   | 4 (4.4)              |
| - AVD + CABG                             | 14 (15.6)            |
| - MVD + CABG                             | 4 (4.4)              |

Values are presented as N (%), mean  $\pm$  SD or median (min-max). BMI = body mass index, LA = left atrium, RA = right atrium.

**Table S5.** Clinical characteristics of patients included in quantification of NCAM and LOX expressions.

|                                          |                      |
|------------------------------------------|----------------------|
| Number of patients                       | 75                   |
| Male                                     | 57 (76)              |
| Age (years)                              | 67.84 ±11.47858      |
| BMI                                      | 26.7500 (19.11-38.2) |
| Type of AF                               |                      |
| - Paroxysmal                             | 9 (12)               |
| - Persistent                             | 17 (22.7)            |
| - Longstanding persistent                | 11 (14.7)            |
| Hypertension                             | 50 (66.7)            |
| Dyslipidemia                             | 17 (22.7)            |
| Diabetes Mellitus                        | 17 (22.7)            |
| Thyroid disease                          | 8 (10.7)             |
| Underlying Cardiac Diseases              |                      |
| - Congenital heart disease (CHD)         | 6 (8)                |
| - Aortic valve disease (AVD)             | 8 (10.7)             |
| - Coronary artery bypass grafting (CABG) | 31 (41.3)            |
| - Mitral valve disease (MVD)             | 12 (16)              |
| - MAZE                                   | 3 (4)                |
| - AVD + CABG                             | 12 (16)              |
| - MVD + CABG                             | 3 (4)                |

Values are presented as N (%), mean ± SD or median (min-max). BMI = body mass index, LA = left atrium, RA = right atrium.

**Table S6.** Clinical characteristics of patients included in serum ratio CITP:MMP1 analysis.

|                                          |                     |
|------------------------------------------|---------------------|
| Number of patients                       | 112                 |
| Male                                     | 81 (72.3)           |
| Age (years)                              | 67.9732 ±10.82245   |
| BMI                                      | 26.735 (18.81-38.2) |
| Type of AF                               |                     |
| - Paroxysmal                             | 20 (17.9)           |
| - Persistent                             | 27 (24.1)           |
| - Longstanding persistent                | 18 (16.1)           |
| Hypertension                             | 73 (65.2)           |
| Dyslipidemia                             | 38 (33.9)           |
| Diabetes Mellitus                        | 26 (23.2)           |
| Thyroid disease                          | 9 (8)               |
| Underlying Cardiac Diseases              |                     |
| - Congenital heart disease (CHD)         | 11 (9.8)            |
| - Aortic valve disease (AVD)             | 15 (13.4)           |
| - Coronary artery bypass grafting (CABG) | 38 (33.9)           |
| - Mitral valve disease (MVD)             | 21 (18.8)           |
| - MAZE                                   | 3 (2.7)             |
| - AVD + CABG                             | 17 (15.2)           |
| - MVD + CABG                             | 6 (5.4)             |

Values are presented as N (%), mean ± SD or median (min-max). BMI = body mass index, LA = left atrium, RA = right atrium.

Figure S1. Left atrial appendage I stained with Picrosirius Red.

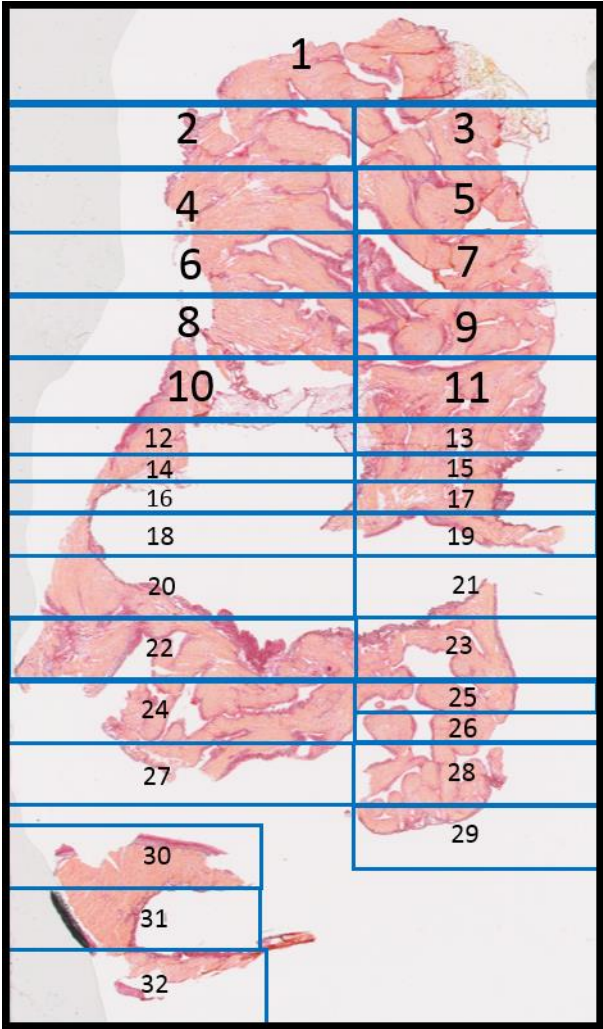

**Table S7.** Quantification of percentage of fibrosis in respect of supplementary figure S1

| <b>Selection area</b> | <b>Amount of fibrosis (%)</b> |
|-----------------------|-------------------------------|
| 1                     | 46,2438                       |
| 2                     | 45,2483                       |
| 3                     | 50,5229                       |
| 4                     | 42,9748                       |
| 5                     | 47,1053                       |
| 6                     | 37,0059                       |
| 7                     | 42,9544                       |
| 8                     | 47,3107                       |
| 9                     | 51,4942                       |
| 10                    | 48,6954                       |
| 11                    | 48,6917                       |
| 12                    | 54,419                        |
| 13                    | 51,7132                       |
| 14                    | 46,8222                       |
| 15                    | 52,1406                       |
| 16                    | 58,0279                       |
| 17                    | 42,4086                       |
| 18                    | 50,6694                       |
| 19                    | 57,078                        |
| 20                    | 37,764                        |
| 21                    | 48,6682                       |
| 22                    | 56,6255                       |



|    |         |
|----|---------|
| 23 | 56,7527 |
| 24 | 51,1785 |
| 25 | 53,4282 |
| 26 | 44,7798 |
| 27 | 49,0972 |
| 28 | 45,6073 |
| 29 | 44,5044 |
| 30 | 43,7838 |
| 31 | 41,3124 |
| 32 | 52,04   |

**Figure S2.** Left atrial appendage II stained with Picrosirius Red.

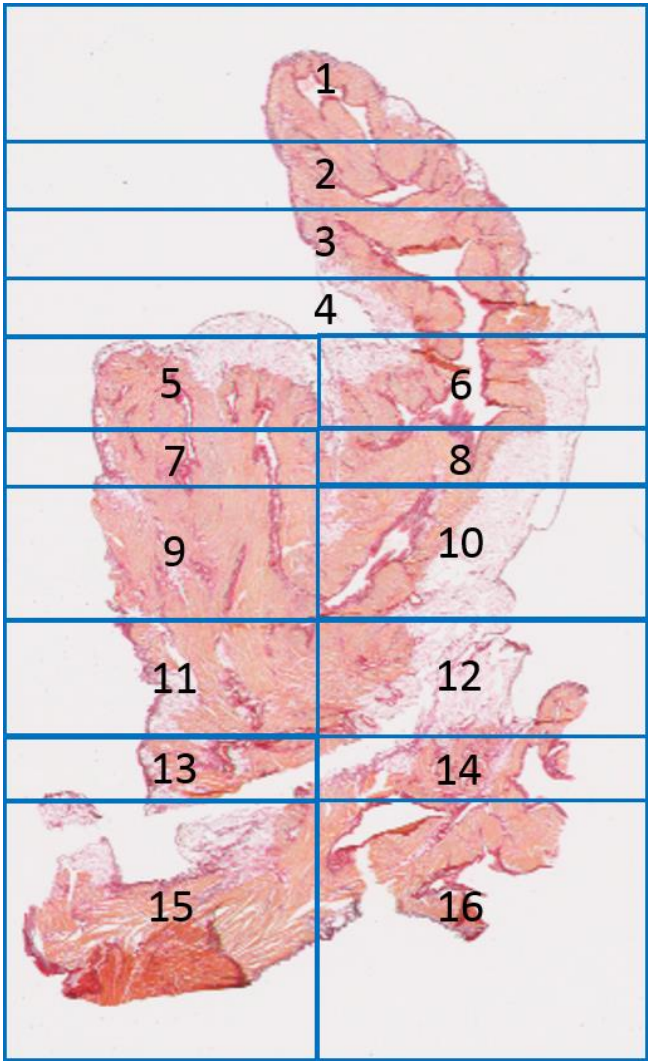

**Table S8.** Quantification of percentage of fibrosis in respect of supplementary figure S2.

| <b>Selection area</b> | <b>Amount of fibrosis (%)</b> |
|-----------------------|-------------------------------|
| 1                     | 68,8                          |
| 2                     | 64,0691                       |
| 3                     | 56,1891                       |
| 4                     | 61,5491                       |
| 5                     | 65,3478                       |
| 6                     | 64,3883                       |
| 7                     | 58,068                        |
| 8                     | 55,3248                       |
| 9                     | 54,7683                       |
| 10                    | 58,5337                       |
| 11                    | 53,2383                       |
| 12                    | 56,4717                       |
| 13                    | 68,233                        |
| 14                    | 70,0463                       |
| 15                    | 57,7396                       |
| 16                    | 60,8296                       |

**Figure S3.** Left atrial appendage III stained with Picrosirius Red.

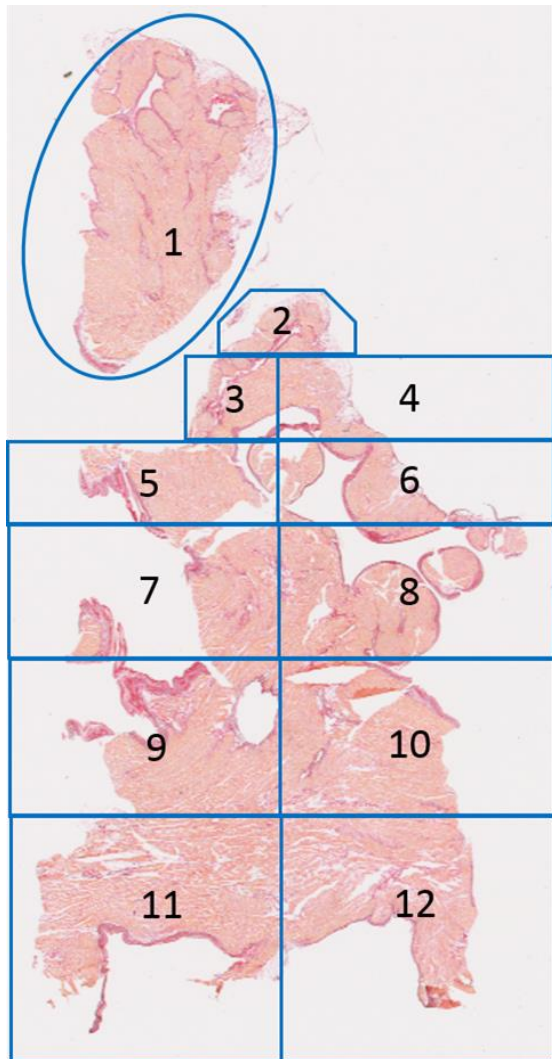

**Table S9.** Quantification of percentage of fibrosis in respect of supplementary figure S3.

| <b>Selection area</b> | <b>Amount of fibrosis (%)</b> |
|-----------------------|-------------------------------|
| 1                     | 45,8856                       |
| 2                     | 57,4743                       |
| 3                     | 49,8173                       |
| 4                     | 49,0287                       |
| 5                     | 46,4721                       |
| 6                     | 53,5367                       |
| 7                     | 45,908                        |
| 8                     | 45,5966                       |
| 9                     | 51,4198                       |
| 10                    | 44,6263                       |
| 11                    | 46,2378                       |
| 12                    | 49,4025                       |

**Figure S4.** Blots of alpha smooth muscle actin (A) and its (B) GAPDH (B); (C) lysyl oxidase and its (D) GAPDH; (E) neural cell adhesion molecule and its (F) GAPDH; (G) tissue inhibitor of metalloproteinase and its (H) GAPDH. C = control, LAA = left atrial appendage, LSPerAF = Long standing persistent atrial fibrillation, ParAF = paroxysmal atrial fibrillation, PerAF = persistent atrial fibrillation, RAA = right atrial fibrillation, REF = reference band.

**A**

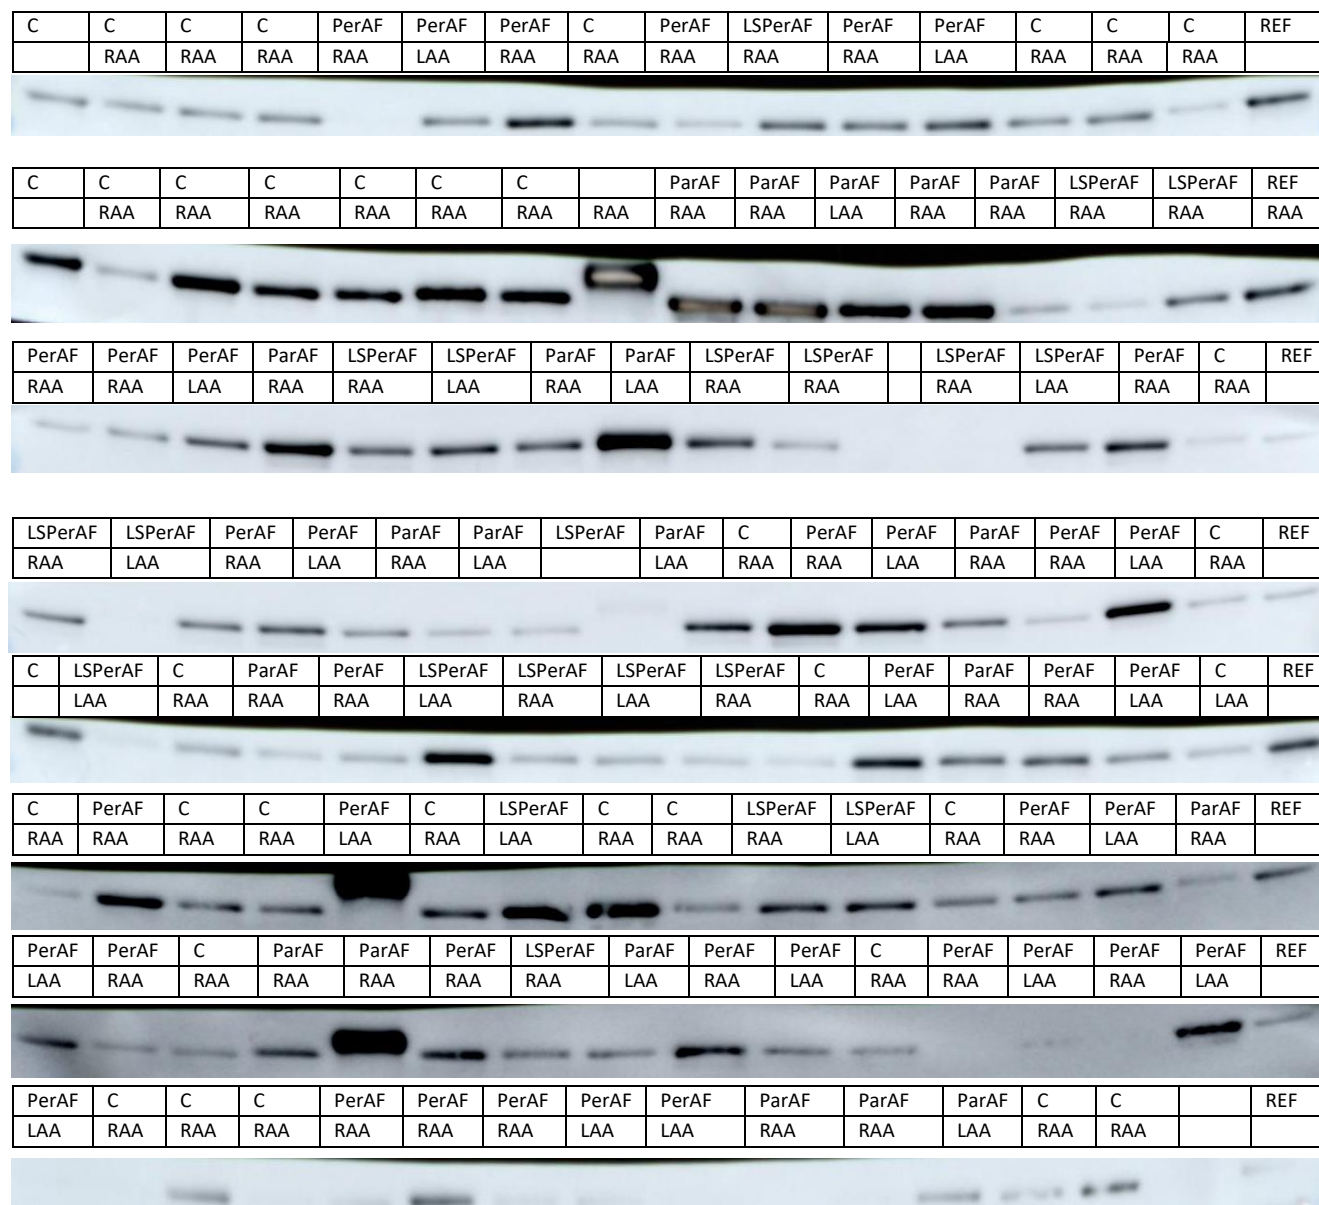

**B**

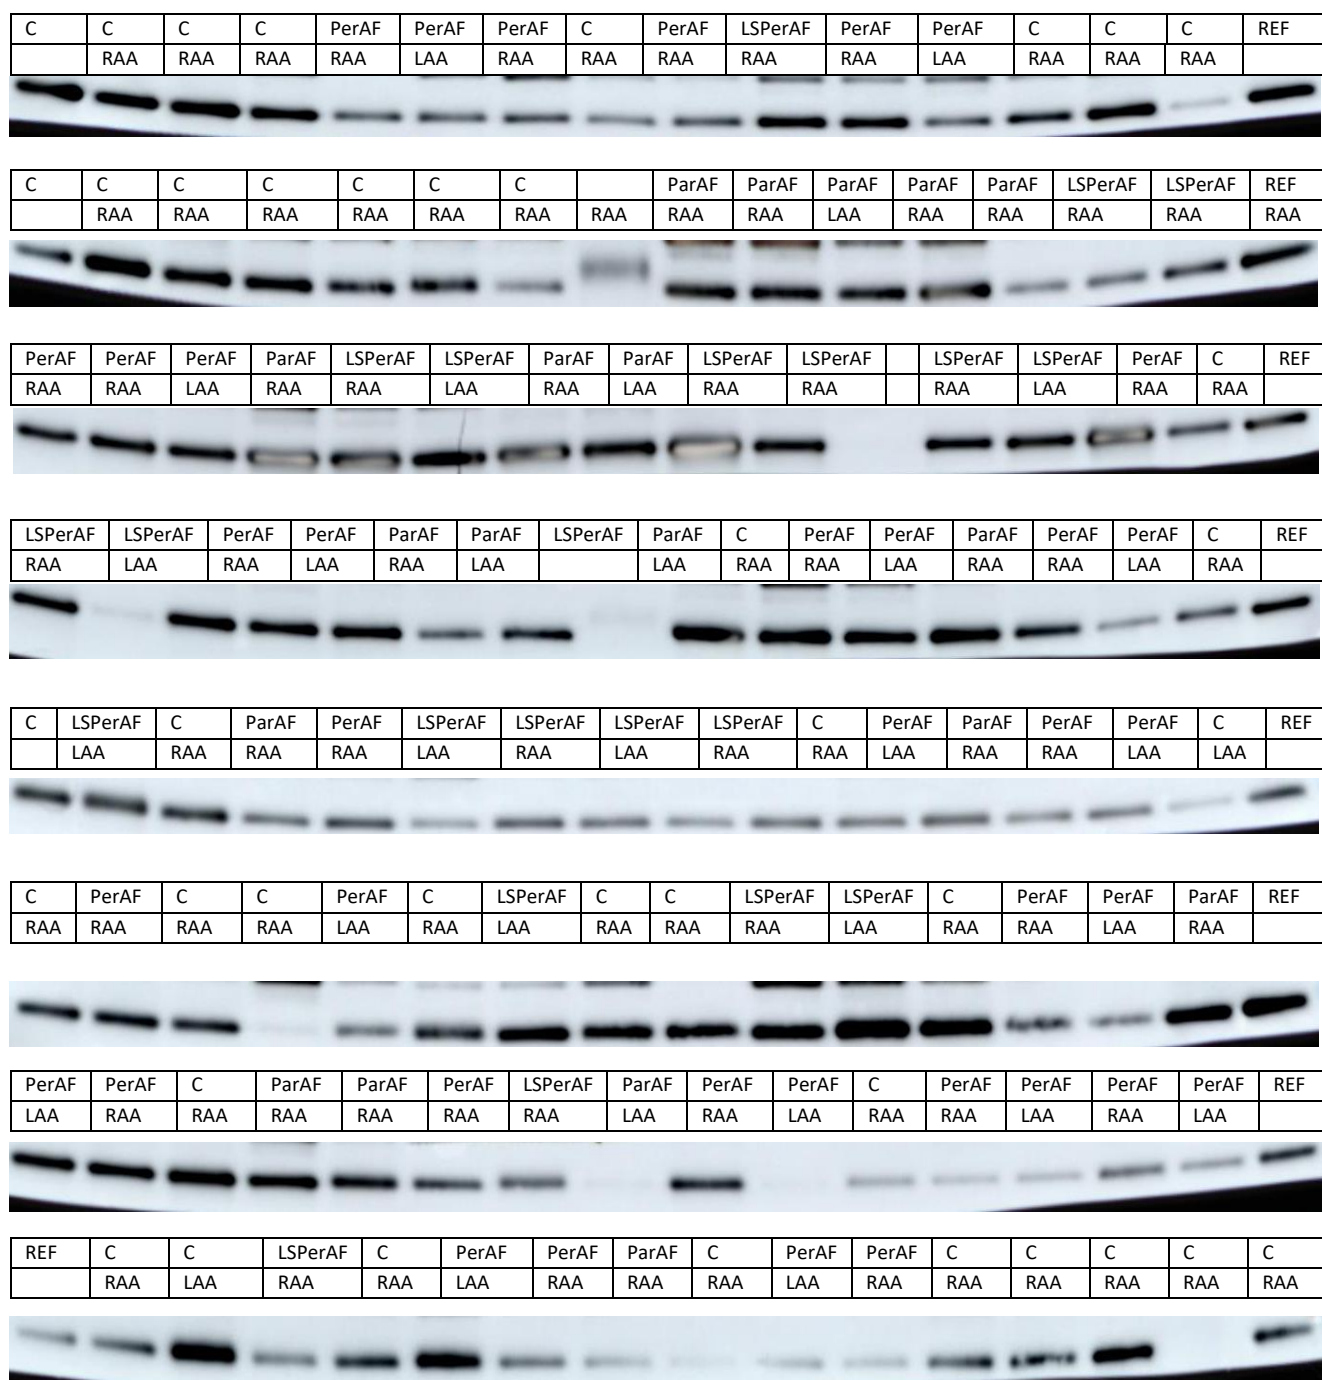

C

|       |     |     |     |     |         |     |     |     |     |     |     |     |     |     |     |
|-------|-----|-----|-----|-----|---------|-----|-----|-----|-----|-----|-----|-----|-----|-----|-----|
| PerAF | C   | C   | C   | C   | LSPerAF | C   | C   | C   | C   | C   | C   | C   | C   | C   | REF |
| LAA   | RAA | RAA | RAA | RAA | RAA     | RAA | RAA | RAA | RAA | RAA | RAA | RAA | RAA | RAA |     |

|     |     |     |     |     |       |       |     |       |       |       |     |         |         |     |     |
|-----|-----|-----|-----|-----|-------|-------|-----|-------|-------|-------|-----|---------|---------|-----|-----|
| C   | C   | C   | C   | C   | PerAF | PerAF | C   | ParAF | PerAF | PerAF | C   | LSPerAF | LSPerAF | C   | REF |
| RAA | RAA | RAA | RAA | RAA | RAA   | LAA   | RAA | RAA   | RAA   | LAA   | RAA | RAA     | LAA     | RAA |     |

|   |       |       |     |     |         |       |     |       |         |         |         |       |       |     |     |
|---|-------|-------|-----|-----|---------|-------|-----|-------|---------|---------|---------|-------|-------|-----|-----|
| C | PerAF | PerAF | C   | C   | LSPerAF | PerAF | C   | PerAF | LSPerAF | LSPerAF | LSPerAF | ParAF | ParAF | C   | REF |
|   | RAA   | RAA   | LAA | RAA | RAA     | RAA   | RAA | RAA   | LAA     | RAA     | LAA     | RAA   | LAA   | RAA |     |

|       |     |     |       |     |         |     |     |         |         |     |       |       |       |       |     |
|-------|-----|-----|-------|-----|---------|-----|-----|---------|---------|-----|-------|-------|-------|-------|-----|
| PerAF | C   | C   | PerAF | C   | LSPerAF | C   | C   | LSPerAF | LSPerAF | C   | PerAF | PerAF | PerAF | ParAF | REF |
| RAA   | RAA | RAA | LAA   | RAA | LAA     | RAA | RAA | LAA     | RAA     | RAA | RAA   | LAA   | RAA   | RAA   |     |

|       |       |         |         |       |       |       |         |     |         |     |         |         |         |         |     |
|-------|-------|---------|---------|-------|-------|-------|---------|-----|---------|-----|---------|---------|---------|---------|-----|
| PerAF | PerAF | LSPerAF | LSPerAF | ParAF | ParAF | ParAF | LSPerAF | C   | LSPerAF | C   | LSPerAF | LSPerAF | LSPerAF | LSPerAF | REF |
| RAA   | LAA   | RAA     | LAA     | RAA   | RAA   | LAA   | RAA     | RAA | RAA     | RAA | RAA     | LAA     | RAA     | LAA     |     |

|       |     |       |       |       |       |       |       |     |       |       |       |       |       |       |     |
|-------|-----|-------|-------|-------|-------|-------|-------|-----|-------|-------|-------|-------|-------|-------|-----|
| PerAF | C   | PerAF | PerAF | ParAF | ParAF | ParAF | ParAF | C   | PerAF | PerAF | ParAF | ParAF | PerAF | PerAF | REF |
| RAA   | RAA | RAA   | LAA   | RAA   | LAA   | RAA   | LAA   | RAA | RAA   | LAA   | RAA   | RAA   | RAA   | LAA   |     |

|       |       |     |     |       |       |       |         |       |       |       |     |       |       |     |     |
|-------|-------|-----|-----|-------|-------|-------|---------|-------|-------|-------|-----|-------|-------|-----|-----|
| PerAF | PerAF | C   | C   | ParAF | ParAF | PerAF | LSPerAF | ParAF | PerAF | PerAF | C   | PerAF | PerAF | C   | REF |
| RAA   | LAA   | RAA | RAA | RAA   | LAA   | RAA   | RAA     | LAA   | RAA   | LAA   | RAA | RAA   | LAA   | RAA |     |

|       |       |       |     |       |         |         |         |       |       |       |       |       |     |     |     |
|-------|-------|-------|-----|-------|---------|---------|---------|-------|-------|-------|-------|-------|-----|-----|-----|
| PerAF | PerAF | ParAF | C   | ParAF | LSPerAF | LSPerAF | LSPerAF | ParAF | PerAF | PerAF | ParAF | ParAF | C   | C   | REF |
| RAA   | LAA   | RAA   | RAA | RAA   | RAA     | LAA     | RAA     | RAA   | RAA   | LAA   | RAA   | LAA   | RAA | RAA |     |



D

|       |     |     |     |     |         |     |     |     |     |     |     |     |     |     |     |
|-------|-----|-----|-----|-----|---------|-----|-----|-----|-----|-----|-----|-----|-----|-----|-----|
| PerAF | C   | C   | C   | C   | LSPerAF | C   | C   | C   | C   | C   | C   | C   | C   | C   | REF |
| LAA   | RAA | RAA | RAA | RAA | RAA     | RAA | RAA | RAA | RAA | RAA | RAA | RAA | RAA | RAA |     |

|     |     |     |     |     |       |       |     |       |       |       |     |         |         |     |     |
|-----|-----|-----|-----|-----|-------|-------|-----|-------|-------|-------|-----|---------|---------|-----|-----|
| C   | C   | C   | C   | C   | PerAF | PerAF | C   | ParAF | PerAF | PerAF | C   | LSPerAF | LSPerAF | C   | REF |
| RAA | RAA | RAA | RAA | RAA | RAA   | LAA   | RAA | RAA   | RAA   | LAA   | RAA | RAA     | LAA     | RAA |     |

|   |       |       |     |     |         |       |     |       |         |         |         |       |       |     |     |
|---|-------|-------|-----|-----|---------|-------|-----|-------|---------|---------|---------|-------|-------|-----|-----|
| C | PerAF | PerAF | C   | C   | LSPerAF | PerAF | C   | PerAF | LSPerAF | LSPerAF | LSPerAF | ParAF | ParAF | C   | REF |
|   | RAA   | RAA   | LAA | RAA | RAA     | RAA   | RAA | RAA   | LAA     | RAA     | LAA     | RAA   | LAA   | RAA |     |

|       |     |     |       |     |         |     |     |         |         |     |       |       |       |       |     |
|-------|-----|-----|-------|-----|---------|-----|-----|---------|---------|-----|-------|-------|-------|-------|-----|
| PerAF | C   | C   | PerAF | C   | LSPerAF | C   | C   | LSPerAF | LSPerAF | C   | PerAF | PerAF | PerAF | ParAF | REF |
| RAA   | RAA | RAA | LAA   | RAA | LAA     | RAA | RAA | LAA     | RAA     | RAA | RAA   | LAA   | RAA   | RAA   |     |

|       |       |         |         |       |       |       |         |     |         |     |         |         |         |         |     |
|-------|-------|---------|---------|-------|-------|-------|---------|-----|---------|-----|---------|---------|---------|---------|-----|
| PerAF | PerAF | LSPerAF | LSPerAF | ParAF | ParAF | ParAF | LSPerAF | C   | LSPerAF | C   | LSPerAF | LSPerAF | LSPerAF | LSPerAF | REF |
| RAA   | LAA   | RAA     | LAA     | RAA   | RAA   | LAA   | RAA     | RAA | RAA     | RAA | RAA     | LAA     | RAA     | LAA     |     |

|       |     |       |       |       |       |       |       |     |       |       |       |       |       |       |     |
|-------|-----|-------|-------|-------|-------|-------|-------|-----|-------|-------|-------|-------|-------|-------|-----|
| PerAF | C   | PerAF | PerAF | ParAF | ParAF | ParAF | ParAF | C   | PerAF | PerAF | ParAF | ParAF | PerAF | PerAF | REF |
| RAA   | RAA | RAA   | LAA   | RAA   | LAA   | RAA   | LAA   | RAA | RAA   | LAA   | RAA   | RAA   | RAA   | LAA   |     |

|       |       |     |     |       |       |       |         |       |       |       |     |       |       |     |     |
|-------|-------|-----|-----|-------|-------|-------|---------|-------|-------|-------|-----|-------|-------|-----|-----|
| PerAF | PerAF | C   | C   | ParAF | ParAF | PerAF | LSPerAF | ParAF | PerAF | PerAF | C   | PerAF | PerAF | C   | REF |
| RAA   | LAA   | RAA | RAA | RAA   | LAA   | RAA   | RAA     | LAA   | RAA   | LAA   | RAA | RAA   | LAA   | RAA |     |

|       |       |       |     |       |         |         |         |       |       |       |       |       |     |     |     |
|-------|-------|-------|-----|-------|---------|---------|---------|-------|-------|-------|-------|-------|-----|-----|-----|
| PerAF | PerAF | ParAF | C   | ParAF | LSPerAF | LSPerAF | LSPerAF | ParAF | PerAF | PerAF | ParAF | ParAF | C   | C   | REF |
| RAA   | LAA   | RAA   | RAA | RAA   | RAA     | LAA     | RAA     | RAA   | RAA   | LAA   | RAA   | LAA   | RAA | RAA |     |

E

|                                                                                      |       |         |         |         |         |       |         |         |         |         |         |         |         |         |     |
|--------------------------------------------------------------------------------------|-------|---------|---------|---------|---------|-------|---------|---------|---------|---------|---------|---------|---------|---------|-----|
| PerAF                                                                                | C     | C       | C       | C       | LSPerAF | C     | C       | C       | C       | C       | C       | C       | C       | C       | REF |
| LAA                                                                                  | RAA   | RAA     | RAA     | RAA     | RAA     | RAA   | RAA     | RAA     | RAA     | RAA     | RAA     | RAA     | RAA     | RAA     |     |
| 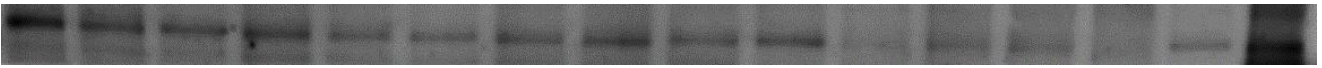   |       |         |         |         |         |       |         |         |         |         |         |         |         |         |     |
| C                                                                                    | C     | C       | C       | C       | PerAF   | PerAF | C       | ParAF   | PerAF   | PerAF   | C       | LSPerAF | LSPerAF | C       | REF |
| RAA                                                                                  | RAA   | RAA     | RAA     | RAA     | RAA     | LAA   | RAA     | RAA     | RAA     | LAA     | RAA     | RAA     | LAA     | RAA     |     |
|    |       |         |         |         |         |       |         |         |         |         |         |         |         |         |     |
| C                                                                                    | PerAF | PerAF   | C       | C       | LSPerAF | PerAF | C       | PerAF   | LSPerAF | LSPerAF | LSPerAF | ParAF   | ParAF   | C       | REF |
|                                                                                      | RAA   | RAA     | LAA     | RAA     | RAA     | RAA   | RAA     | RAA     | LAA     | RAA     | LAA     | RAA     | LAA     | RAA     |     |
|    |       |         |         |         |         |       |         |         |         |         |         |         |         |         |     |
| PerAF                                                                                | C     | C       | PerAF   | C       | LSPerAF | C     | C       | LSPerAF | LSPerAF | C       | PerAF   | PerAF   | ParAF   | PerAF   | REF |
| RAA                                                                                  | RAA   | RAA     | LAA     | RAA     | LAA     | RAA   | RAA     | RAA     | LAA     | RAA     | RAA     | LAA     | RAA     | RAA     |     |
|    |       |         |         |         |         |       |         |         |         |         |         |         |         |         |     |
| PerAF                                                                                | PerAF | LSPerAF | LSPerAF | ParAF   | ParAF   | ParAF | LSPerAF | C       | LSPerAF | C       | LSPerAF | LSPerAF | LSPerAF | LSPerAF | REF |
| RAA                                                                                  | LAA   | RAA     | LAA     | RAA     | RAA     | LAA   | RAA     | RAA     | RAA     | RAA     | RAA     | LAA     | RAA     | LAA     |     |
|   |       |         |         |         |         |       |         |         |         |         |         |         |         |         |     |
| PerAF                                                                                | C     | PerAF   | PerAF   | ParAF   | ParAF   | ParAF | ParAF   | C       | PerAF   | PerAF   | ParAF   | ParAF   | PerAF   | PerAF   | REF |
| RAA                                                                                  | RAA   | RAA     | LAA     | RAA     | LAA     | RAA   | LAA     | RAA     | RAA     | LAA     | RAA     | RAA     | RAA     | LAA     |     |
|  |       |         |         |         |         |       |         |         |         |         |         |         |         |         |     |
| PerAF                                                                                | PerAF | C       | C       | ParAF   | ParAF   | PerAF | LSPerAF | ParAF   | PerAF   | PerAF   | C       | PerAF   | PerAF   | C       | REF |
| RAA                                                                                  | LAA   | RAA     | RAA     | RAA     | LAA     | RAA   | RAA     | LAA     | RAA     | LAA     | RAA     | RAA     | LAA     | RAA     |     |
|  |       |         |         |         |         |       |         |         |         |         |         |         |         |         |     |
| PerAF                                                                                | PerAF | C       | ParAF   | LSPerAF | LSPerAF | ParAF | PerAF   | PerAF   | ParAF   | ParAF   | C       | C       | C       | C       | REF |
| RAA                                                                                  | LAA   | RAA     | RAA     | RAA     | RAA     | RAA   | RAA     | LAA     | RAA     | LAA     | RAA     | RAA     | RAA     | LAA     |     |
|  |       |         |         |         |         |       |         |         |         |         |         |         |         |         |     |

F

|       |     |     |     |     |         |     |     |     |     |     |     |     |     |     |     |
|-------|-----|-----|-----|-----|---------|-----|-----|-----|-----|-----|-----|-----|-----|-----|-----|
| PerAF | C   | C   | C   | C   | LSPerAF | C   | C   | C   | C   | C   | C   | C   | C   | C   | REF |
| LAA   | RAA | RAA | RAA | RAA | RAA     | RAA | RAA | RAA | RAA | RAA | RAA | RAA | RAA | RAA |     |

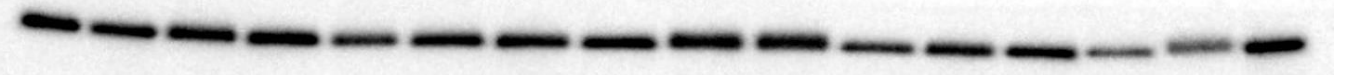

|     |     |     |     |     |       |       |     |       |       |       |     |         |         |     |     |
|-----|-----|-----|-----|-----|-------|-------|-----|-------|-------|-------|-----|---------|---------|-----|-----|
| C   | C   | C   | C   | C   | PerAF | PerAF | C   | ParAF | PerAF | PerAF | C   | LSPerAF | LSPerAF | C   | REF |
| RAA | RAA | RAA | RAA | RAA | RAA   | LAA   | RAA | RAA   | RAA   | LAA   | RAA | RAA     | LAA     | RAA |     |

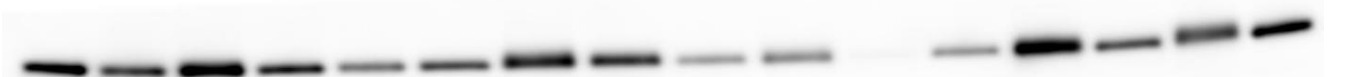

|   |       |       |     |     |         |       |     |       |         |         |         |       |       |     |     |
|---|-------|-------|-----|-----|---------|-------|-----|-------|---------|---------|---------|-------|-------|-----|-----|
| C | PerAF | PerAF | C   | C   | LSPerAF | PerAF | C   | PerAF | LSPerAF | LSPerAF | LSPerAF | ParAF | ParAF | C   | REF |
|   | RAA   | RAA   | LAA | RAA | RAA     | RAA   | RAA | RAA   | LAA     | RAA     | LAA     | RAA   | LAA   | RAA |     |

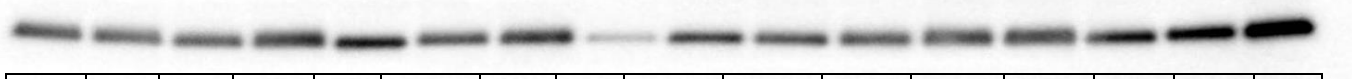

|       |     |     |       |     |         |     |     |         |         |     |       |       |       |       |     |
|-------|-----|-----|-------|-----|---------|-----|-----|---------|---------|-----|-------|-------|-------|-------|-----|
| PerAF | C   | C   | PerAF | C   | LSPerAF | C   | C   | LSPerAF | LSPerAF | C   | PerAF | PerAF | ParAF | PerAF | REF |
| RAA   | RAA | RAA | LAA   | RAA | LAA     | RAA | RAA | RAA     | LAA     | RAA | RAA   | LAA   | RAA   | RAA   |     |

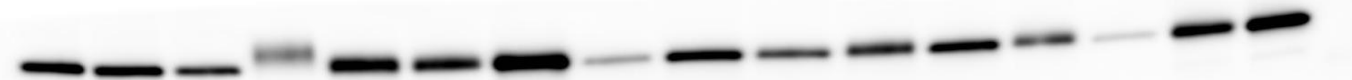

|       |       |         |         |       |       |       |         |     |         |     |         |         |         |         |     |
|-------|-------|---------|---------|-------|-------|-------|---------|-----|---------|-----|---------|---------|---------|---------|-----|
| PerAF | PerAF | LSPerAF | LSPerAF | ParAF | ParAF | ParAF | LSPerAF | C   | LSPerAF | C   | LSPerAF | LSPerAF | LSPerAF | LSPerAF | REF |
| RAA   | LAA   | RAA     | LAA     | RAA   | RAA   | LAA   | RAA     | RAA | RAA     | RAA | RAA     | LAA     | RAA     | LAA     |     |

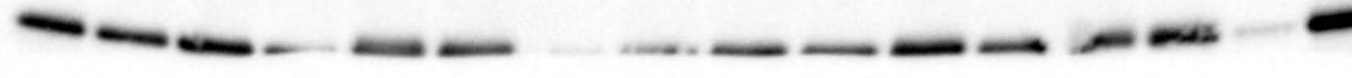

|       |     |       |       |       |       |       |       |     |       |       |       |       |       |       |     |
|-------|-----|-------|-------|-------|-------|-------|-------|-----|-------|-------|-------|-------|-------|-------|-----|
| PerAF | C   | PerAF | PerAF | ParAF | ParAF | ParAF | ParAF | C   | PerAF | PerAF | ParAF | ParAF | PerAF | PerAF | REF |
| RAA   | RAA | RAA   | LAA   | RAA   | LAA   | RAA   | LAA   | RAA | RAA   | LAA   | RAA   | RAA   | RAA   | LAA   |     |

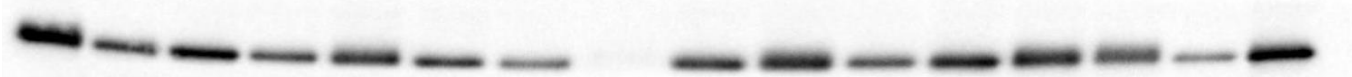

|       |       |     |     |       |       |       |         |       |       |       |     |       |       |     |     |
|-------|-------|-----|-----|-------|-------|-------|---------|-------|-------|-------|-----|-------|-------|-----|-----|
| PerAF | PerAF | C   | C   | ParAF | ParAF | PerAF | LSPerAF | ParAF | PerAF | PerAF | C   | PerAF | PerAF | C   | REF |
| RAA   | LAA   | RAA | RAA | RAA   | LAA   | RAA   | RAA     | LAA   | RAA   | LAA   | RAA | RAA   | LAA   | RAA |     |

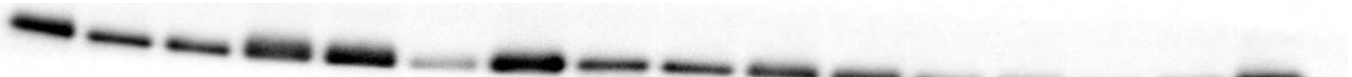

|       |       |     |       |         |         |       |       |       |       |       |     |     |     |     |     |
|-------|-------|-----|-------|---------|---------|-------|-------|-------|-------|-------|-----|-----|-----|-----|-----|
| PerAF | PerAF | C   | ParAF | LSPerAF | LSPerAF | ParAF | PerAF | PerAF | ParAF | ParAF | C   | C   | C   | C   | REF |
| RAA   | LAA   | RAA | RAA   | RAA     | RAA     | RAA   | RAA   | LAA   | RAA   | LAA   | RAA | RAA | RAA | LAA |     |

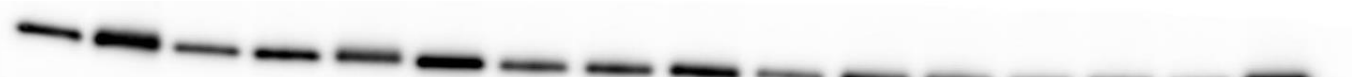

**G**

|     |     |     |     |     |     |     |     |     |         |     |     |     |     |       |     |
|-----|-----|-----|-----|-----|-----|-----|-----|-----|---------|-----|-----|-----|-----|-------|-----|
| C   | C   | C   | C   | C   | C   | C   | C   | C   | LSPerAF | C   | C   | C   | C   | PerAF | REF |
| RAA     | RAA | RAA | RAA | RAA | LAA   |     |

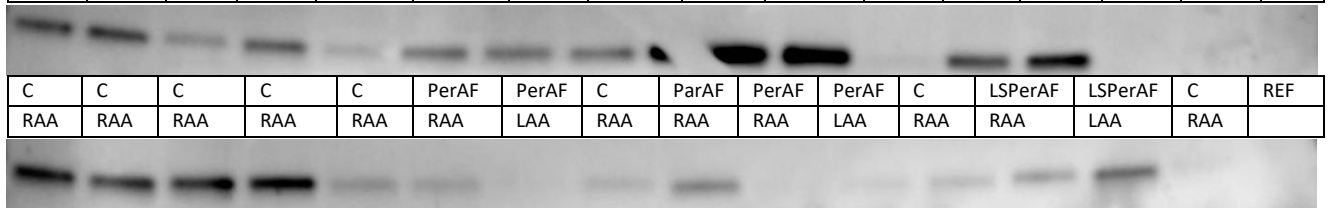

|     |       |       |     |     |         |       |     |       |         |         |         |       |       |     |     |
|-----|-------|-------|-----|-----|---------|-------|-----|-------|---------|---------|---------|-------|-------|-----|-----|
| C   | PerAF | PerAF | C   | C   | LSPerAF | PerAF | C   | PerAF | LSPerAF | LSPerAF | LSPerAF | ParAF | ParAF | C   | REF |
| RAA | RAA   | RAA   | LAA | RAA | RAA     | RAA   | RAA | RAA   | LAA     | RAA     | LAA     | RAA   | LAA   | RAA |     |

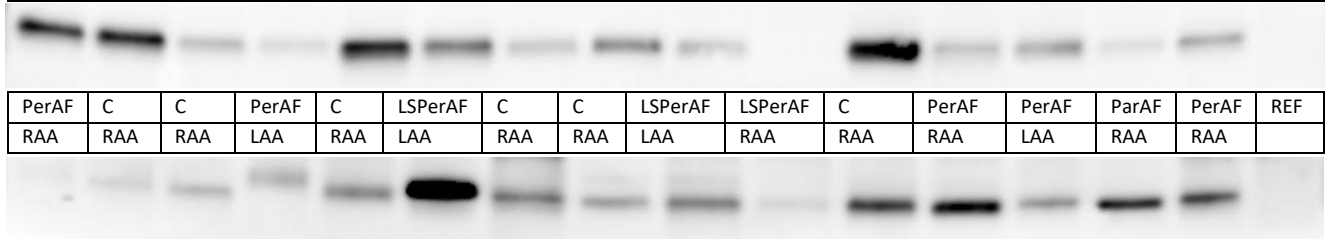

|       |     |     |       |     |         |     |     |         |         |     |       |       |       |       |     |
|-------|-----|-----|-------|-----|---------|-----|-----|---------|---------|-----|-------|-------|-------|-------|-----|
| PerAF | C   | C   | PerAF | C   | LSPerAF | C   | C   | LSPerAF | LSPerAF | C   | PerAF | PerAF | ParAF | PerAF | REF |
| RAA   | RAA | RAA | LAA   | RAA | LAA     | RAA | RAA | LAA     | RAA     | RAA | RAA   | LAA   | RAA   | RAA   |     |

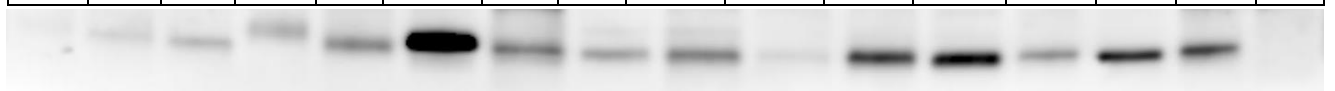

|       |       |         |         |       |       |       |         |     |         |     |         |         |       |         |     |
|-------|-------|---------|---------|-------|-------|-------|---------|-----|---------|-----|---------|---------|-------|---------|-----|
| PerAF | PerAF | LSPerAF | LSPerAF | ParAF | ParAF | ParAF | LSPerAF | C   | LSPerAF | C   | LSPerAF | LSPerAF | PerAF | LSPerAF | REF |
| RAA   | LAA   | RAA     | LAA     | RAA   | RAA   | LAA   | RAA     | RAA | RAA     | RAA | RAA     | LAA     | RAA   | LAA     |     |

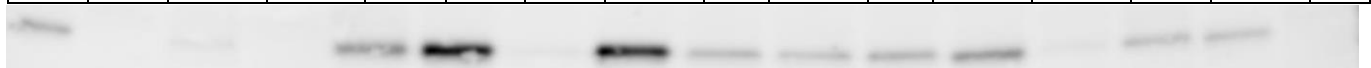

|         |         |       |       |       |       |       |       |     |       |       |       |       |       |       |     |
|---------|---------|-------|-------|-------|-------|-------|-------|-----|-------|-------|-------|-------|-------|-------|-----|
| LSPerAF | LSPerAF | PerAF | PerAF | ParAF | ParAF | ParAF | ParAF | C   | PerAF | PerAF | ParAF | ParAF | PerAF | PerAF | REF |
| RAA     | LAA     | RAA   | LAA   | RAA   | LAA   | RAA   | LAA   | RAA | RAA   | LAA   | RAA   | RAA   | RAA   | LAA   |     |

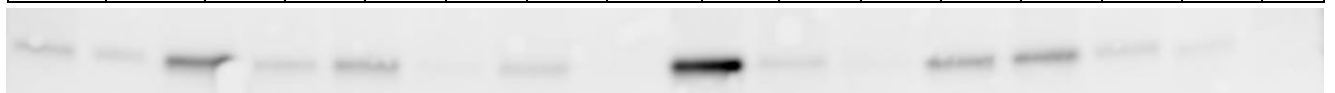

|       |       |     |     |       |       |       |         |       |       |       |     |       |       |       |     |
|-------|-------|-----|-----|-------|-------|-------|---------|-------|-------|-------|-----|-------|-------|-------|-----|
| PerAF | PerAF | C   | C   | ParAF | ParAF | PerAF | LSPerAF | ParAF | PerAF | PerAF | C   | PerAF | PerAF | ParAF | REF |
| RAA   | LAA   | RAA | RAA | RAA   | LAA   | RAA   | RAA     | LAA   | RAA   | LAA   | RAA | RAA   | LAA   | RAA   |     |

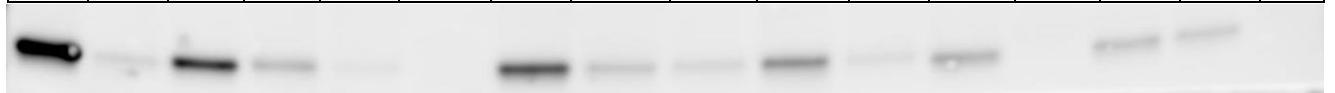

|       |       |       |     |       |         |         |         |       |       |       |       |       |     |     |     |
|-------|-------|-------|-----|-------|---------|---------|---------|-------|-------|-------|-------|-------|-----|-----|-----|
| PerAF | PerAF | ParAF | C   | ParAF | LSPerAF | LSPerAF | LSPerAF | ParAF | PerAF | PerAF | ParAF | ParAF | C   | C   | REF |
| RAA   | LAA   | RAA   | RAA | RAA   | RAA     | LAA     | RAA     | RAA   | RAA   | LAA   | RAA   | LAA   | RAA | RAA |     |

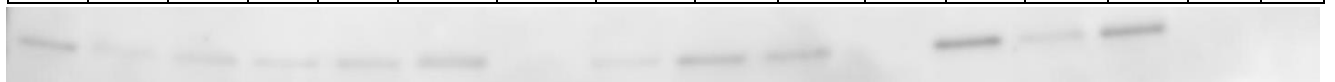

H

|     |     |     |     |     |     |     |     |     |         |     |     |     |     |       |     |
|-----|-----|-----|-----|-----|-----|-----|-----|-----|---------|-----|-----|-----|-----|-------|-----|
| C   | C   | C   | C   | C   | C   | C   | C   | C   | LSPerAF | C   | C   | C   | C   | PerAF | REF |
| RAA     | RAA | RAA | RAA | RAA | LAA   |     |

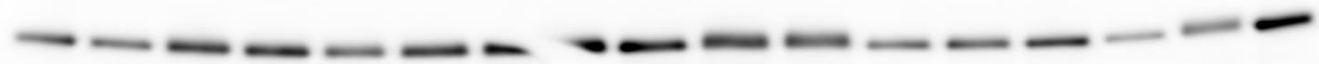

|     |     |     |     |     |       |       |     |       |       |       |     |         |         |     |     |
|-----|-----|-----|-----|-----|-------|-------|-----|-------|-------|-------|-----|---------|---------|-----|-----|
| C   | C   | C   | C   | C   | PerAF | PerAF | C   | ParAF | PerAF | PerAF | C   | LSPerAF | LSPerAF | C   | REF |
| RAA | RAA | RAA | RAA | RAA | RAA   | LAA   | RAA | RAA   | RAA   | LAA   | RAA | RAA     | LAA     | RAA |     |

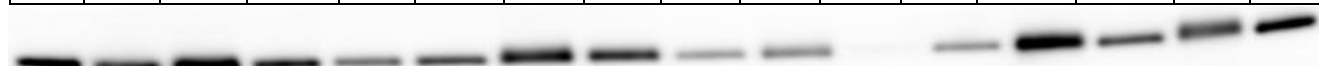

|   |       |       |     |     |         |       |     |       |         |         |         |       |       |     |     |
|---|-------|-------|-----|-----|---------|-------|-----|-------|---------|---------|---------|-------|-------|-----|-----|
| C | PerAF | PerAF | C   | C   | LSPerAF | PerAF | C   | PerAF | LSPerAF | LSPerAF | LSPerAF | ParAF | ParAF | C   | REF |
|   | RAA   | RAA   | LAA | RAA | RAA     | RAA   | RAA | RAA   | LAA     | RAA     | LAA     | RAA   | LAA   | RAA |     |

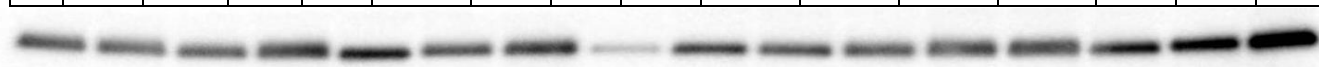

|       |     |     |       |     |         |     |     |         |         |     |       |       |       |       |     |
|-------|-----|-----|-------|-----|---------|-----|-----|---------|---------|-----|-------|-------|-------|-------|-----|
| PerAF | C   | C   | PerAF | C   | LSPerAF | C   | C   | LSPerAF | LSPerAF | C   | PerAF | PerAF | ParAF | PerAF | REF |
| RAA   | RAA | RAA | LAA   | RAA | LAA     | RAA | RAA | LAA     | RAA     | RAA | RAA   | LAA   | RAA   | RAA   |     |

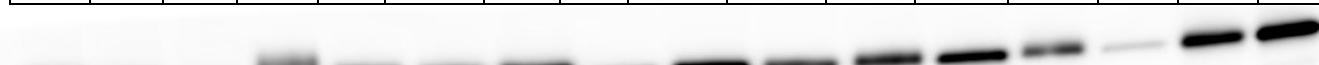

|       |       |         |         |       |       |       |         |     |         |     |         |         |       |         |     |
|-------|-------|---------|---------|-------|-------|-------|---------|-----|---------|-----|---------|---------|-------|---------|-----|
| PerAF | PerAF | LSPerAF | LSPerAF | ParAF | ParAF | ParAF | LSPerAF | C   | LSPerAF | C   | LSPerAF | LSPerAF | PerAF | LSPerAF | REF |
| RAA   | LAA   | RAA     | LAA     | RAA   | RAA   | LAA   | RAA     | RAA | RAA     | RAA | RAA     | LAA     | RAA   | LAA     |     |

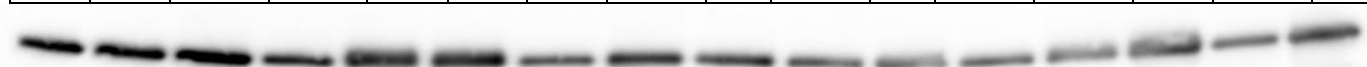

|         |         |       |       |       |       |       |       |     |       |       |       |       |       |       |     |
|---------|---------|-------|-------|-------|-------|-------|-------|-----|-------|-------|-------|-------|-------|-------|-----|
| LSPerAF | LSPerAF | PerAF | PerAF | ParAF | ParAF | ParAF | ParAF | C   | PerAF | PerAF | ParAF | ParAF | PerAF | PerAF | REF |
| RAA     | LAA     | RAA   | LAA   | RAA   | LAA   | RAA   | LAA   | RAA | RAA   | LAA   | RAA   | RAA   | RAA   | LAA   |     |

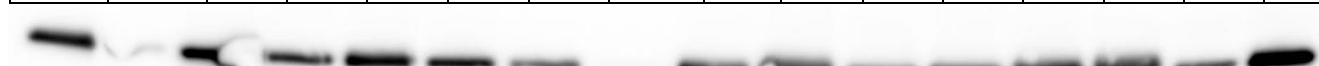

|       |       |     |     |       |       |       |         |       |       |       |     |       |       |       |     |
|-------|-------|-----|-----|-------|-------|-------|---------|-------|-------|-------|-----|-------|-------|-------|-----|
| PerAF | PerAF | C   | C   | ParAF | ParAF | PerAF | LSPerAF | ParAF | PerAF | PerAF | C   | PerAF | PerAF | ParAF | REF |
| RAA   | LAA   | RAA | RAA | RAA   | LAA   | RAA   | RAA     | LAA   | RAA   | LAA   | RAA | RAA   | LAA   | RAA   |     |

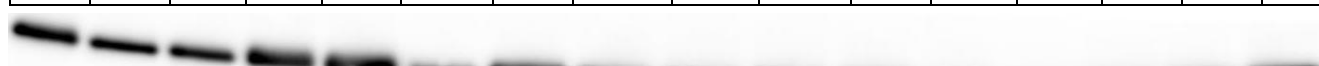

|       |       |       |     |       |         |         |         |       |       |       |       |       |     |     |     |
|-------|-------|-------|-----|-------|---------|---------|---------|-------|-------|-------|-------|-------|-----|-----|-----|
| PerAF | PerAF | ParAF | C   | ParAF | LSPerAF | LSPerAF | LSPerAF | ParAF | PerAF | PerAF | ParAF | ParAF | C   | C   | REF |
| RAA   | LAA   | RAA   | RAA | RAA   | RAA     | LAA     | RAA     | RAA   | RAA   | LAA   | RAA   | LAA   | RAA | RAA |     |

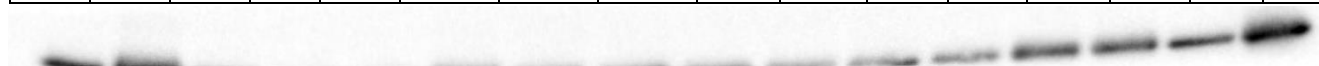

**Figure S5. Degree of fibrosis and post-operative AF.** Picrosirius red staining reveals comparable degree of fibrosis between patients with and without post-operative AF. PoAF = post-operative AF.  $P > 0,05$ .

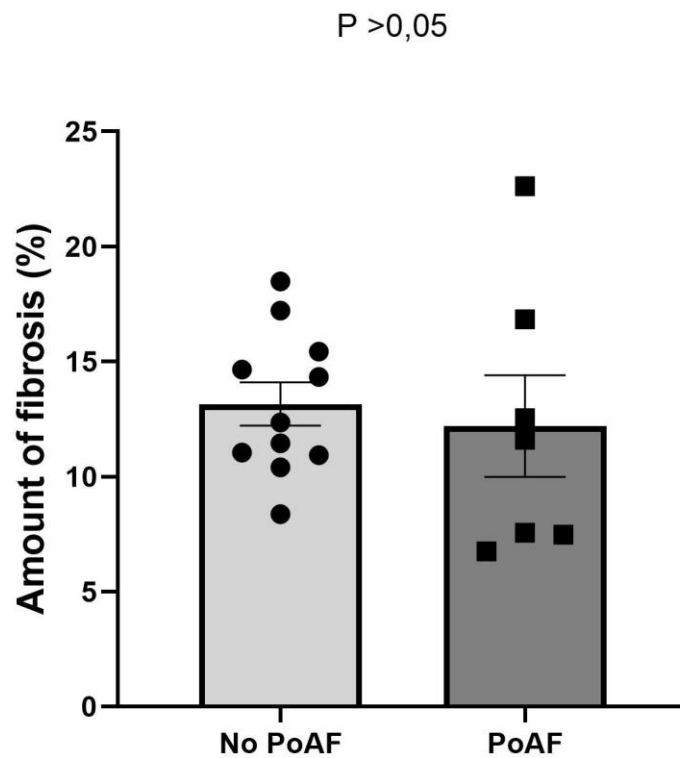

**Table S10.** Fibrosis parameters in right atrial appendages, using Western blot.

|            | <b><math>\alpha</math>-SMA/GAPDH<br/>(arbitrary unit:<br/>a.u)</b> | <b>TIMP/GAPDH<br/>(a.u)</b> | <b>NCAM/GAPDH<br/>(a.u.)</b> | <b>LOX/GAPDH<br/>(a.u.)</b> |
|------------|--------------------------------------------------------------------|-----------------------------|------------------------------|-----------------------------|
| Patient 1  | 0,135                                                              | 0,993                       | 0,74                         | 0,65                        |
| Patient 2  | 0,129                                                              | 1,247                       | 0,693                        | 1,42                        |
| Patient 3  | 1,114                                                              | 0,504                       | 0,558                        | 0,8                         |
| Patient 4  | 0,113                                                              | 0,551                       | 0,675                        | 1,27                        |
| Patient 5  | 0,295                                                              | 0,396                       | 1,172                        | 1,04                        |
| Patient 6  | 0,332                                                              | 0,659                       | 0,709                        | 0,85                        |
| Patient 7  | 0,413                                                              | 0,463                       | 0,618                        | 0,65                        |
| Patient 8  | 0,065                                                              | 0,676                       | 0,446                        | 1,26                        |
| Patient 9  | 0,787                                                              | 1,113                       | 0,617                        | 1,11                        |
| Patient 10 | 0,084                                                              | 1,905                       | 0,472                        | 1,25                        |
| Patient 11 | 0,165                                                              | 0,574                       | 0,627                        | 0,83                        |
| Patient 12 | 0,639                                                              | 1,855                       | 0,662                        | 0,71                        |
| Patient 13 | 0,906                                                              |                             |                              |                             |
| Patient 14 | 0,918                                                              | 2,172                       | 0,748                        | 0,98                        |
| Patient 15 | 0,25                                                               | 0,349                       | 1,693                        | 0,53                        |
| Patient 16 | 0,201                                                              | 1,279                       | 0,34                         | 1,41                        |
| Patient 17 | 0,362                                                              | 1,741                       | 0,384                        | 0,71                        |
| Patient 18 | 1,175                                                              | 1,366                       | 0,432                        | 1,05                        |
| Patient 19 | 0,796                                                              | 1,192                       | 0,509                        | 0,69                        |
| Patient 20 | 0,297                                                              | 0,491                       | 0,363                        | 0,87                        |
| Patient 21 | 0,872                                                              | 0,531                       | 0,294                        | 0,96                        |

|            |       |       |       |      |
|------------|-------|-------|-------|------|
| Patient 22 | 0,34  | 0,459 | 0,3   | 0,89 |
| Patient 23 | 0,36  | 1,442 | 0,387 | 0,46 |
| Patient 24 | 0,466 | 0,235 | 0,4   | 1,34 |
| Patient 25 | 0,282 | 1,272 | 0,397 | 0,76 |
| Patient 26 | 0,769 | 1,318 | 0,26  | 1,53 |
| Patient 27 | 1,226 | 0,238 | 0,605 | 0,76 |
| Patient 28 | 0,765 | 1,072 | 0,745 | 0,79 |
| Patient 29 | 0,049 | 1,547 | 0,732 | 0,66 |
| Patient 30 | 1,424 | 0,119 | 0,682 | 0,71 |
| Patient 31 | 0,612 | 1,781 | 0,92  | 0,77 |
| Patient 32 | 0,63  | 1,063 | 0,668 | 0,71 |
| Patient 33 | 0,229 | 0,262 | 0,8   | 1,68 |
| Patient 34 | 0,42  | 3,513 |       |      |
| Patient 35 | 0,603 | 0,269 | 0,755 | 1,19 |
| Patient 36 |       |       |       | 1,2  |
| Patient 37 | 1,918 | 3,466 | 0,899 |      |
| Patient 38 | 0,743 | 0,476 | 1,256 |      |
| Patient 39 | 0,223 | 0,234 | 0,852 | 1,08 |
| Patient 40 | 1,273 | 0,082 | 0,782 |      |
| Patient 41 | 0,525 | 0,264 | 0,745 | 0,84 |
| Patient 42 | 1,126 | 0,758 | 1,352 |      |
| Patient 43 |       |       |       | 0,61 |
| Patient 44 | 0,754 | 0,839 | 0,614 | 0,48 |
| Patient 45 |       |       |       | 0,49 |
| Patient 46 | 0,981 | 0,433 | 0,884 | 1,03 |
| Patient 47 | 0,459 | 2,029 | 0,781 |      |



|            |       |       |       |      |
|------------|-------|-------|-------|------|
| Patient 48 | 0,348 | 1,049 | 0,447 | 0,61 |
| Patient 49 | 0,454 | 1,672 | 0,79  |      |
| Patient 50 | 0,477 | 1,531 | 0,765 | 0,54 |
| Patient 51 | 0,418 | 4,65  | 0,544 | 0,43 |
| Patient 52 | 0,408 | 0,956 | 1,052 | 0,93 |
| Patient 53 | 0,326 | 0,752 | 0,43  |      |
| Patient 54 | 0,754 | 0,179 | 0,832 | 0,49 |
| Patient 55 | 1,273 | 1,203 | 0,646 |      |
| Patient 56 | 0,957 | 2,494 | 0,59  | 2,89 |
| Patient 57 | 0,809 | 2,225 | 0,38  | 1,29 |
| Patient 58 | 1     | 0,487 | 0,52  | 0,87 |
| Patient 59 | 0,496 | 0,332 | 0,778 | 2,03 |
| Patient 60 | 0,23  | 0,428 | 0,304 |      |
| Patient 61 | 0,044 | 1,775 | 0,444 | 4,05 |
| Patient 62 | 1,023 | 0,346 | 0,784 | 1,14 |
| Patient 63 | 0,542 | 0,4   | 0,922 | 0,66 |
| Patient 64 | 0,807 | 0,658 | 0,792 | 0,11 |
| Patient 65 | 0,437 | 1,422 | 0,78  |      |
| Patient 66 | 1,287 | 0,724 | 0,799 | 0,49 |
| Patient 67 | 0,244 | 0,818 | 0,619 | 0,44 |
| Patient 68 | 0,649 | 2,181 | 1,1   | 0,31 |
| Patient 69 | 1,733 | 0,392 | 1,137 |      |
| Patient 70 | 0,43  | 0,905 | 0,832 | 0,4  |
| Patient 71 | 0,744 | 0,905 | 0,75  | 1,84 |
| Patient 72 | 0,681 | 0,471 | 1,134 | 1,06 |
| Patient 73 | 0,733 | 2,805 | 0,502 | 0,63 |

|            |       |       |       |      |
|------------|-------|-------|-------|------|
| Patient 74 | 0,419 | 2,136 | 0,451 | 0,81 |
| Patient 75 | 0,338 | 0,434 | 0,428 | 0,54 |
| Patient 76 | 0,602 | 0,123 | 0,355 |      |
| Patient 77 | 0,471 | 1,1   | 0,423 | 0,27 |
| Patient 78 | 0,668 | 0,435 | 0,534 | 1,48 |
| Patient 79 | 1,132 | 0,756 | 0,449 | 1,04 |
| Patient 80 | 1,078 | 0,373 | 0,627 | 1,23 |
| Patient 81 | 0,208 | 0,496 |       | 0,76 |
| Patient 82 | 0,521 | 0,609 |       | 0,54 |
| Patient 83 | 0,098 | 0,313 |       |      |
| Patient 84 | 0,558 | 0,763 |       | 0,76 |
| Patient 85 | 0,51  | 0,803 |       | 0,68 |
| Patient 86 | 0,219 | 0,856 |       | 0,65 |
| Patient 87 | 0,492 | 0,311 |       | 0,83 |
| Patient 88 | 0,411 | 1,751 |       | 1,9  |
| Patient 89 | 0,323 | 0,503 |       | 1    |
| Patient 90 | 0,401 | 3,048 |       |      |
| Patient 91 | 1,102 | 1,871 |       | 1,01 |
| Patient 92 |       |       |       | 0,72 |
| Patient 93 | 1,018 | 0,203 |       | 0,53 |
| Patient 94 |       | 0,248 |       |      |
| Patient 95 | 1,3   |       |       |      |

**Table S11.** Serum C1TP:MMP1 ratio.

| Serum C1TP:MMP1 ratio (a.u.) |       |            |       |
|------------------------------|-------|------------|-------|
| Patient 1                    | 0,028 | Patient 56 | 0,058 |
| Patient 2                    | 0,024 | Patient 57 | 0,048 |
| Patient 3                    | 0,018 | Patient 58 | 0,142 |
| Patient 4                    | 0,029 | Patient 59 | 0,029 |
| Patient 5                    | 0,03  | Patient 60 | 0,048 |
| Patient 6                    | 0,027 | Patient 61 | 0,044 |
| Patient 7                    | 0,027 | Patient 62 | 0,016 |
| Patient 8                    | 0,034 | Patient 63 | 0,027 |
| Patient 9                    | 0,011 | Patient 64 | 0,027 |
| Patient 10                   | 0,049 | Patient 65 | 0,042 |
| Patient 11                   | 0,016 | Patient 66 | 0,039 |
| Patient 12                   | 0,056 | Patient 67 | 0,1   |
| Patient 13                   | 0,024 | Patient 68 | 0,069 |
| Patient 14                   | 0,029 | Patient 69 | 0,048 |
| Patient 15                   | 0,024 | Patient 70 | 0,042 |
| Patient 16                   | 0,015 | Patient 71 | 0,039 |
| Patient 17                   | 0,056 | Patient 72 | 0,151 |
| Patient 18                   | 0,013 | Patient 73 | 0,024 |
| Patient 19                   | 0,028 | Patient 74 | 0,019 |
| Patient 20                   | 0,019 | Patient 75 | 0,128 |
| Patient 21                   | 0,008 | Patient 76 | 0,023 |
| Patient 22                   | 0,057 | Patient 77 | 0,04  |

|            |       |             |       |
|------------|-------|-------------|-------|
| Patient 23 | 0,039 | Patient 78  | 0,141 |
| Patient 24 | 0,009 | Patient 79  | 0,069 |
| Patient 25 | 0,008 | Patient 80  | 0,038 |
| Patient 26 | 0,031 | Patient 81  | 0,029 |
| Patient 27 | 0,042 | Patient 82  | 0,187 |
| Patient 28 | 0,018 | Patient 83  | 0,034 |
| Patient 29 | 0,072 | Patient 84  | 0,071 |
| Patient 30 | 0,023 | Patient 85  | 0,065 |
| Patient 31 | 0,024 | Patient 86  | 0,046 |
| Patient 32 | 0,136 | Patient 87  | 0,066 |
| Patient 33 | 0,025 | Patient 88  | 0,037 |
| Patient 34 | 0,005 | Patient 89  | 0,111 |
| Patient 35 | 0,051 | Patient 90  | 0,054 |
| Patient 36 | 0,042 | Patient 91  | 0,022 |
| Patient 37 | 0,022 | Patient 92  | 0,048 |
| Patient 38 | 0,034 | Patient 93  | 0,046 |
| Patient 39 | 0,031 | Patient 94  | 0,038 |
| Patient 40 | 0,032 | Patient 95  | 0,174 |
| Patient 41 | 0,062 | Patient 96  | 0,08  |
| Patient 42 | 0,044 | Patient 97  | 0,03  |
| Patient 43 | 0,026 | Patient 98  | 0,233 |
| Patient 44 | 0,035 | Patient 99  | 0,014 |
| Patient 45 | 0,069 | Patient 100 | 0,036 |
| Patient 46 | 0,049 | Patient 101 | 0,05  |
| Patient 47 | 0,02  | Patient 102 | 0,041 |
| Patient 48 | 0,028 | Patient 103 | 0,037 |

|            |       |             |       |
|------------|-------|-------------|-------|
| Patient 49 | 0,021 | Patient 104 | 0,061 |
| Patient 50 | 0,068 | Patient 105 | 0,026 |
| Patient 51 | 0,107 | Patient 106 | 0,036 |
| Patient 52 | 0,014 | Patient 107 | 0,044 |
| Patient 53 | 0,053 | Patient 108 | 0,064 |
| Patient 54 | 0,026 | Patient 109 | 0,048 |
| Patient 55 | 0,04  | Patient 110 | 0,109 |

**Table S12.** Histological parameters for fibrosis.

|            | <b>Cardiomyocyte D.<br/>(<math>\mu\text{m}</math>)</b> | <b>Endomysial<br/>F. (<math>\mu\text{m}</math>)</b> | <b>Perimysium F.<br/>(<math>\mu\text{m}</math>)</b> | <b>Total fibrosis –<br/>Picrosirius (%)</b> |
|------------|--------------------------------------------------------|-----------------------------------------------------|-----------------------------------------------------|---------------------------------------------|
| Patient 1  | 18,256                                                 |                                                     |                                                     | 11,05                                       |
| Patient 2  |                                                        |                                                     |                                                     | 11,599                                      |
| Patient 3  |                                                        |                                                     |                                                     | 17,016                                      |
| Patient 4  |                                                        |                                                     |                                                     | 12,538                                      |
| Patient 5  | 26,929                                                 |                                                     |                                                     | 14,658                                      |
| Patient 6  | 41,162                                                 | 5,206                                               | 18,789                                              | 7,193                                       |
| Patient 7  | 37,016                                                 | 4,994                                               | 16,004                                              | 6,746                                       |
| Patient 8  | 37,178                                                 | 6,831                                               | 21,974                                              | 15,428                                      |
| Patient 9  | 39,185                                                 | 3,912                                               | 13,308                                              | 7,554                                       |
| Patient 10 | 46,148                                                 | 4,352                                               | 13,846                                              | 8,364                                       |
| Patient 11 | 20,002                                                 |                                                     |                                                     | 11,652                                      |
| Patient 12 | 44,027                                                 | 3,639                                               | 18,221                                              | 12,227                                      |
| Patient 13 | 28,774                                                 | 3,372                                               | 12,354                                              | 15,707                                      |

|            |        |       |        |        |
|------------|--------|-------|--------|--------|
| Patient 14 |        |       |        | 17,447 |
| Patient 15 | 46,143 |       |        | 13,971 |
| Patient 16 |        |       |        | 8,477  |
| Patient 17 |        |       |        | 10,95  |
| Patient 18 | 36,625 | 3,516 | 9,45   | 14,354 |
| Patient 19 | 33,853 | 2,484 | 10,665 | 16,41  |
| Patient 20 |        |       |        | 14,339 |
| Patient 21 |        |       |        | 22,63  |
| Patient 22 | 45,585 | 6,432 | 15,408 | 7,473  |
| Patient 23 | 38,661 | 3,597 | 17,2   | 7,332  |
| Patient 24 |        |       |        | 16,841 |
| Patient 25 | 39,359 | 5,21  | 15,073 | 11,348 |
| Patient 26 | 32,537 | 4,899 | 20,7   | 8,861  |
| Patient 27 | 43,019 | 5,062 | 15,252 | 15,216 |
| Patient 28 | 37,557 |       |        | 9,479  |
| Patient 29 | 52,057 | 4,304 | 19,639 | 12,541 |
| Patient 30 | 37,805 | 4,041 | 16,075 | 11,689 |
| Patient 31 | 33,689 | 5,675 | 20,896 | 9,304  |
| Patient 32 |        |       |        | 25,14  |
| Patient 33 | 48,94  |       |        | 14,183 |
| Patient 34 |        |       |        | 18,481 |
| Patient 35 |        |       |        | 13,302 |
| Patient 36 |        |       |        | 16,489 |
| Patient 37 |        |       |        | 15,111 |
| Patient 38 |        |       |        | 12,477 |
| Patient 39 |        |       |        | 18,105 |

|            |        |       |        |        |
|------------|--------|-------|--------|--------|
| Patient 40 |        |       |        | 14,511 |
| Patient 41 | 41,947 |       |        | 11,455 |
| Patient 42 |        |       |        | 16,636 |
| Patient 43 |        |       |        | 17,299 |
| Patient 44 |        |       |        | 10,243 |
| Patient 45 | 43,881 |       |        | 18,225 |
| Patient 46 | 37,18  |       |        | 17,211 |
| Patient 47 | 38,814 | 4,394 | 13,048 | 10,93  |
| Patient 48 | 40,664 |       |        | 19,369 |
| Patient 49 | 27,034 |       |        | 16,83  |
| Patient 50 | 55,436 |       |        | 11,418 |
| Patient 51 | 45,75  | 6,032 | 15,983 | 12,896 |
| Patient 52 | 56,911 | 5,498 | 16,194 | 10,17  |
| Patient 53 | 58,321 | 3,832 | 12,519 | 11,778 |
| Patient 54 | 61,017 | 3,612 | 14,418 | 12,707 |
| Patient 55 | 54,266 | 5,475 | 14,376 | 12,354 |
| Patient 56 | 44,819 | 6,795 | 19,224 | 8,994  |
| Patient 57 | 45,134 | 6,517 | 11,836 | 15,522 |
| Patient 58 | 48,784 | 6,543 | 14,784 | 16,222 |
| Patient 59 |        |       |        | 15,305 |
| Patient 60 | 53,425 | 6,979 | 12,212 | 14,388 |
| Patient 61 | 34,029 | 4,984 | 10,377 | 15,694 |
| Patient 62 | 39,782 | 4,883 | 11,845 | 10,408 |

**Table S13.** Electrophysiological parameters.

|            | <b>Low-voltage (%)</b> | <b>Conduction Block (%)</b> | <b>Conduction block and delay (%)</b> | <b>Length Conduction block and delay</b> | <b>Conduction velocity</b> |
|------------|------------------------|-----------------------------|---------------------------------------|------------------------------------------|----------------------------|
| Patient 1  | 0,709                  | 3,012                       | 4,217                                 | 16,000                                   | 0,919                      |
| Patient 2  | 1,489                  | 0,241                       | 2,530                                 |                                          | 0,896                      |
| Patient 3  | 0,000                  | 0,000                       | 0,000                                 |                                          | 1,054                      |
| Patient 4  | 0,355                  | 1,506                       | 4,317                                 | 16,000                                   | 0,916                      |
| Patient 5  | 46,992                 | 0,000                       | 0,000                                 |                                          | 0,512                      |
| Patient 6  | 1,066                  | 0,121                       | 4,232                                 | 4,000                                    | 0,908                      |
| Patient 7  | 1,729                  | 1,732                       | 3,313                                 | 16,000                                   | 0,966                      |
| Patient 8  | 7,692                  | 5,832                       | 9,113                                 | 32,000                                   | 0,787                      |
| Patient 9  | 10,478                 | 0,000                       | 0,602                                 |                                          | 0,878                      |
| Patient 10 | 1,867                  | 1,515                       | 3,030                                 | 12,000                                   | 0,913                      |
| Patient 11 | 2,933                  | 2,121                       | 5,833                                 | 20,000                                   | 0,916                      |
| Patient 12 | 2,553                  | 1,205                       | 6,145                                 | 20,000                                   | 0,908                      |
| Patient 13 | 2,432                  | 0,313                       | 1,719                                 | 10,000                                   | 0,914                      |
| Patient 14 | 0,213                  | 0,000                       | 2,169                                 |                                          | 0,867                      |
| Patient 15 | 0,269                  | 0,000                       | 0,154                                 |                                          | 1,007                      |
| Patient 16 | 5,323                  | 10,870                      | 18,261                                | 14,000                                   |                            |
| Patient 17 | 8,708                  | 0,000                       | 6,522                                 |                                          |                            |
| Patient 18 | 11,576                 | 0,585                       | 11,550                                |                                          |                            |
| Patient 19 | 1,068                  | 0,000                       | 0,806                                 |                                          | 1,014                      |



|            |        |        |        |        |       |
|------------|--------|--------|--------|--------|-------|
| Patient 20 | 0,478  | 6,359  | 13,591 | 26,000 |       |
| Patient 21 | 1,872  | 0,000  | 1,818  |        | 0,925 |
| Patient 22 | 1,997  | 1,058  | 4,409  | 10,000 | 0,901 |
| Patient 23 | 4,521  | 7,831  | 15,813 | 32,000 | 0,724 |
| Patient 24 | 0,213  | 0,361  | 3,735  | 8,000  | 0,791 |
| Patient 25 | 1,991  | 0,127  | 2,038  | 6,000  | 0,865 |
| Patient 26 | 1,609  | 0,307  | 1,074  |        | 1,000 |
| Patient 27 | 18,767 | 1,832  | 8,855  | 34,000 | 0,896 |
| Patient 28 | 0,134  | 0,000  | 0,000  |        | 0,991 |
| Patient 29 | 0,638  | 0,602  | 5,542  | 4,000  | 0,780 |
| Patient 30 | 0,213  | 1,816  | 3,753  | 10,000 | 0,911 |
| Patient 31 | 0,214  | 0,000  | 0,122  |        | 1,133 |
| Patient 32 | 0,710  | 0,806  | 3,625  | 12,000 | 1,003 |
| Patient 33 | 0,355  | 0,201  | 2,811  | 8,000  | 1,002 |
| Patient 34 | 6,809  | 0,000  | 5,663  |        | 0,769 |
| Patient 35 | 13,220 | 12,954 | 18,281 | 62,000 | 0,790 |

**Authors note:**

Patient numbers do not correspond across all tables. Arbitrary orders of patient number were applied for each table.
